# Supplementary material for: The Frizzled-dependent planar polarity pathway locally promotes E-cadherin turnover via recruitment of RhoGEF2
Source: PubMed Central journal article supplement — Development. 2013 Mar 1;140(5):1045–54. doi: 10.1242/dev.088724 (PMC3583042; doi:10.1242/dev.088724), 2013-03-01
Supplement: supp_140.5.1045_DEV088724.pdf [file supp_140.5.1045_DEV088724.pdf]

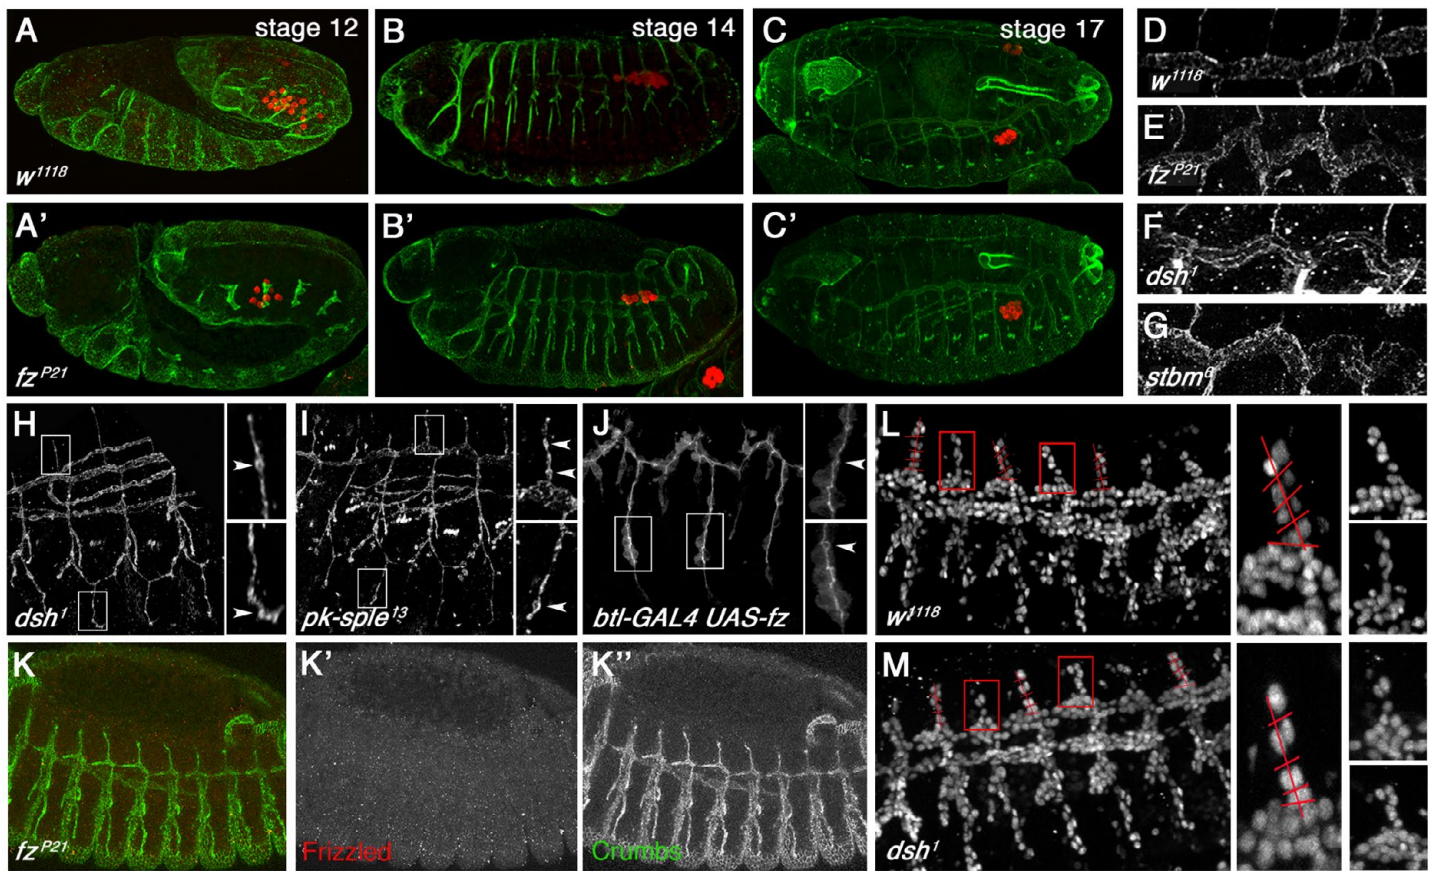

**Fig. S1. Effects of loss of core planar polarity activity on embryonic and tracheal system development.** (A-C') Scoring stage of tracheal development versus general embryonic development on the basis of embryonic morphology (epidermal tissues stained with anti-Crums in green) and pole cell migration (stained for anti-Vasa in red) shows no delay in tracheal development in embryos lacking core pathway activity. *w<sup>1118</sup>* (wild type) (A-C) and *fz<sup>P21</sup>* (A'-C') embryos at stage 12 (A,A'), stage 14 (B,B') and stage 17 (C,C'). (D-G) Dorsal trunk labelled with Crumbs in *w<sup>1118</sup>* (wild type) (D), and planar polarity mutants *fz<sup>P21</sup>* (E), *dsh<sup>1</sup>* (F), *stbm<sup>6</sup>* (G). (H-J) Lateral view of embryonic tracheal branches at stage 14 showing defects in cell intercalation in core pathway mutant embryos stained for the junctional marker Crumbs in *dsh<sup>1</sup>* (H) and *pk-sple<sup>13</sup>* (I), or GFP in *btl-GAL4/UAS-fz* embryos co-expressing  $\alpha$ -Cat-GFP (J). Compare with *w<sup>1118</sup>* (wild type) in Fig. 1A. Insets show magnified regions of indicated dorsal and ventral branches, arrowheads indicate unresolved intercalations. (K-K'') Specificity of the anti-Fz antibody in the embryo. Loss of Fz immunostaining in *fz<sup>P21</sup>* mutants [Fz (red or white), Crumbs (green or white)]. Compare with supplementary material Fig.S2D. (L,M) Tracheal cells are similarly aligned in stage 13 dorsal branches in wild-type (L) and *dsh<sup>1</sup>* (M) embryos. The larger insets show examples of well-aligned pairs of cells and smaller insets show poorly aligned pairs of cells (marked as red boxes on main panel), in both genotypes.

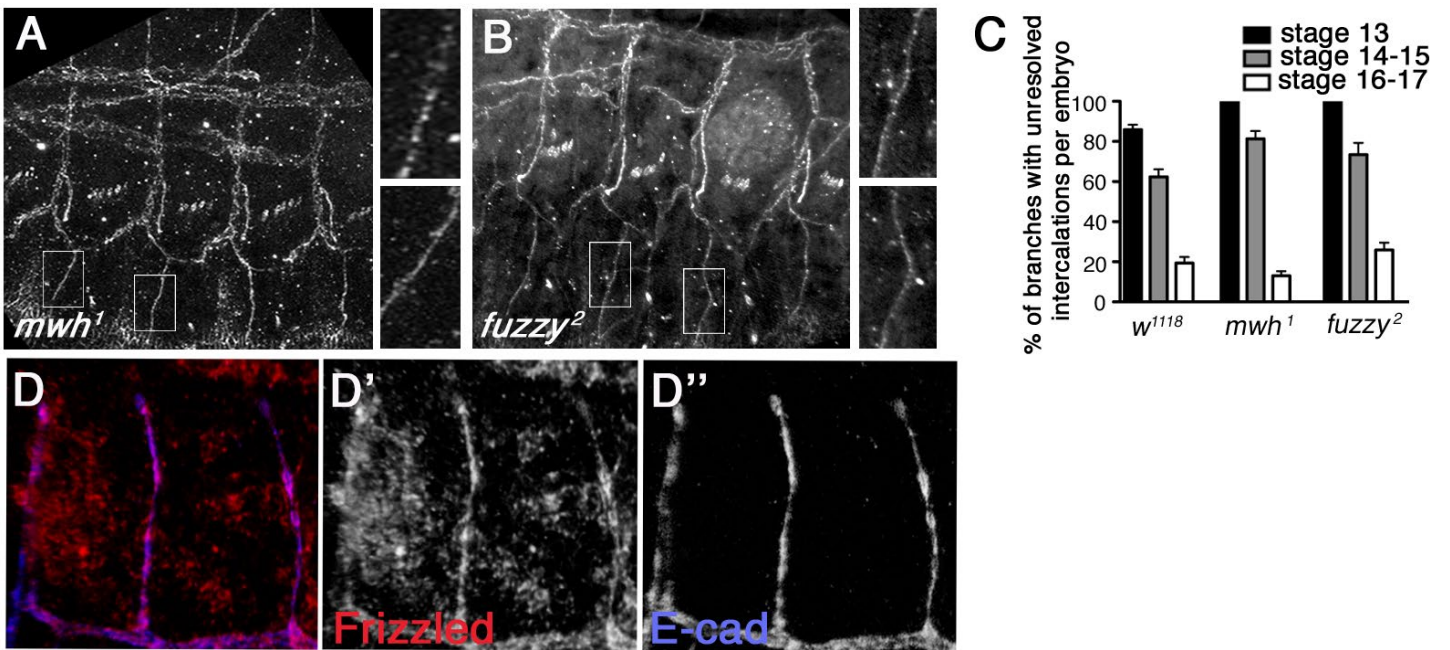

**Fig. S2. Fuzzy and Multiple Wing Hairs are not required for tracheal branch intercalation.** (A,B) Lateral view of embryonic tracheal branches at stage 14 showing cell intercalation in embryos lacking activity of downstream effectors of the core pathway, stained for the junctional marker Crumbs. (A) *mwh*<sup>1</sup> (B) *fuzzy*<sup>2</sup>. Compare with *w*<sup>1118</sup> (wild type) in Fig. 1A. Insets show magnified regions of indicated branches. (C) Quantification of the number of branches with unresolved intercalations at stages 13, 14-15 and 16-17. Error bars are s.e.m. ANOVAs were used to compare the wild-type control and the mutant conditions at each stage: stage 13,  $P=0.012$ ; stage 14-15,  $P=0.072$ ; stage 16-17,  $P=0.069$ . (D) Co-labelling of Fz (red in D or white in D') and E-cad (blue in D or white in D'') in junctions of stage 15 tracheal branches.

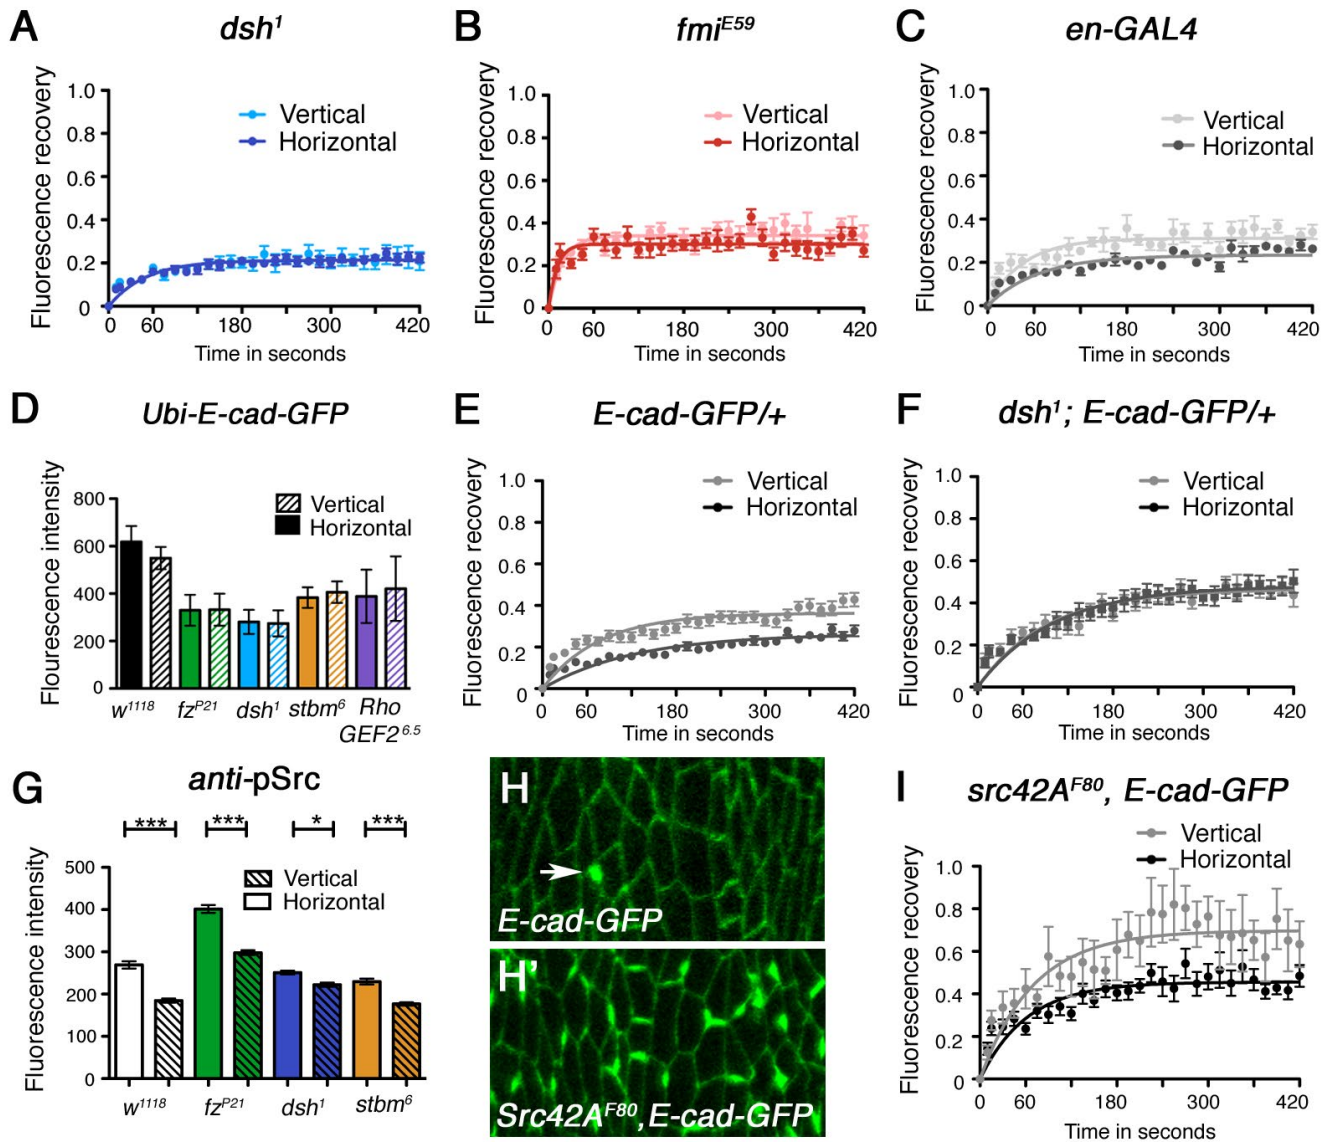

**Fig. S3. Effects of the core planar polarity pathway and Src42A on E-cad turnover in the embryonic epidermis.** (A-C) FRAP analysis in the epidermis of junctional E-cad-GFP expressed under control of the *ubiquitin* promoter in *dsh*<sup>1</sup> embryos ( $P=0.83$  comparing stable fractions on vertical and horizontal junctions, *t*-test), *fmi*<sup>E59</sup> ( $P=0.13$ ), *en-GAL4* ( $P\leq 0.0001$ ). (D) Quantification of E-cad-GFP under control of the *ubiquitin* promoter in the epidermis at stage 8, measured on vertical and horizontal junctions, for *w*<sup>1118</sup> (wild type) (black bars), and core pathway mutants *fz*<sup>P21</sup> (green bars), *dsh*<sup>1</sup> (blue bars), *stbm*<sup>6</sup> (orange bars) and *Rho**GEF2*<sup>6.5/+</sup> antimorphs (purple bars). Note that E-cad is no longer enriched on horizontal junctions in the mutant backgrounds, but overall E-cad-GFP levels go down, presumably due to competition from increased levels of endogenous E-cad. (E,F) FRAP analysis of junctional E-cad-GFP expressed under its endogenous promoter, one copy of E-cad-GFP present heterozygous with one copy of wild-type E-cad. In a wild-type background, a larger stable fraction is seen on horizontal junctions than on vertical junctions ( $P\leq 0.0001$ , *t*-test); this difference is lost in a *dsh*<sup>1</sup> background ( $P=0.63$ , *t*-test). (G) Quantification of pSrc on horizontal and vertical junctions in the epidermis of stage 8 embryos, *w*<sup>1118</sup> (wild type) (white bars) and core pathway mutants *fz*<sup>P21</sup> (green bars), *dsh*<sup>1</sup> (blue bars) and *stbm*<sup>6</sup> (orange bars). pSrc remains higher on horizontal than vertical junctions in the absence of core protein activity; however, overall levels are increased in a similar fashion to the increase in overall E-cad levels seen in these backgrounds (compare with Fig. 4G). pSrc asymmetry is therefore independent of either core protein activity or E-cad distribution; however, additional E-cad at junctions may be recruiting additional Src, consistent with the reported physical interaction between Src and E-cad (Takahashi et al., 2005). An ANOVA comparing all intensities shows that they vary significantly,  $P\leq 0.0001$ . Asterisks above chart show individual results from the ANOVA. \* $P=0.0123$ , \*\*\* $P<0.0001$ . (H) Localisation of E-cad-GFP expressed at endogenous levels in a wild-type background (H) and in a *Src42A* zygotic mutant (H'). E-cad-GFP localises to the junctions in the *Src42A* background, and large aggregates of E-cad-GFP are also visible localising at the cell periphery. Arrow indicates a sensory organ precursor. (I) FRAP analysis was performed on regions of the junctions away from the large aggregates of E-cad-GFP. E-cad-GFP recovery still shows a difference between vertical and horizontal junctions in *Src42A* mutant embryos ( $P\leq 0.0001$ , *t*-test).

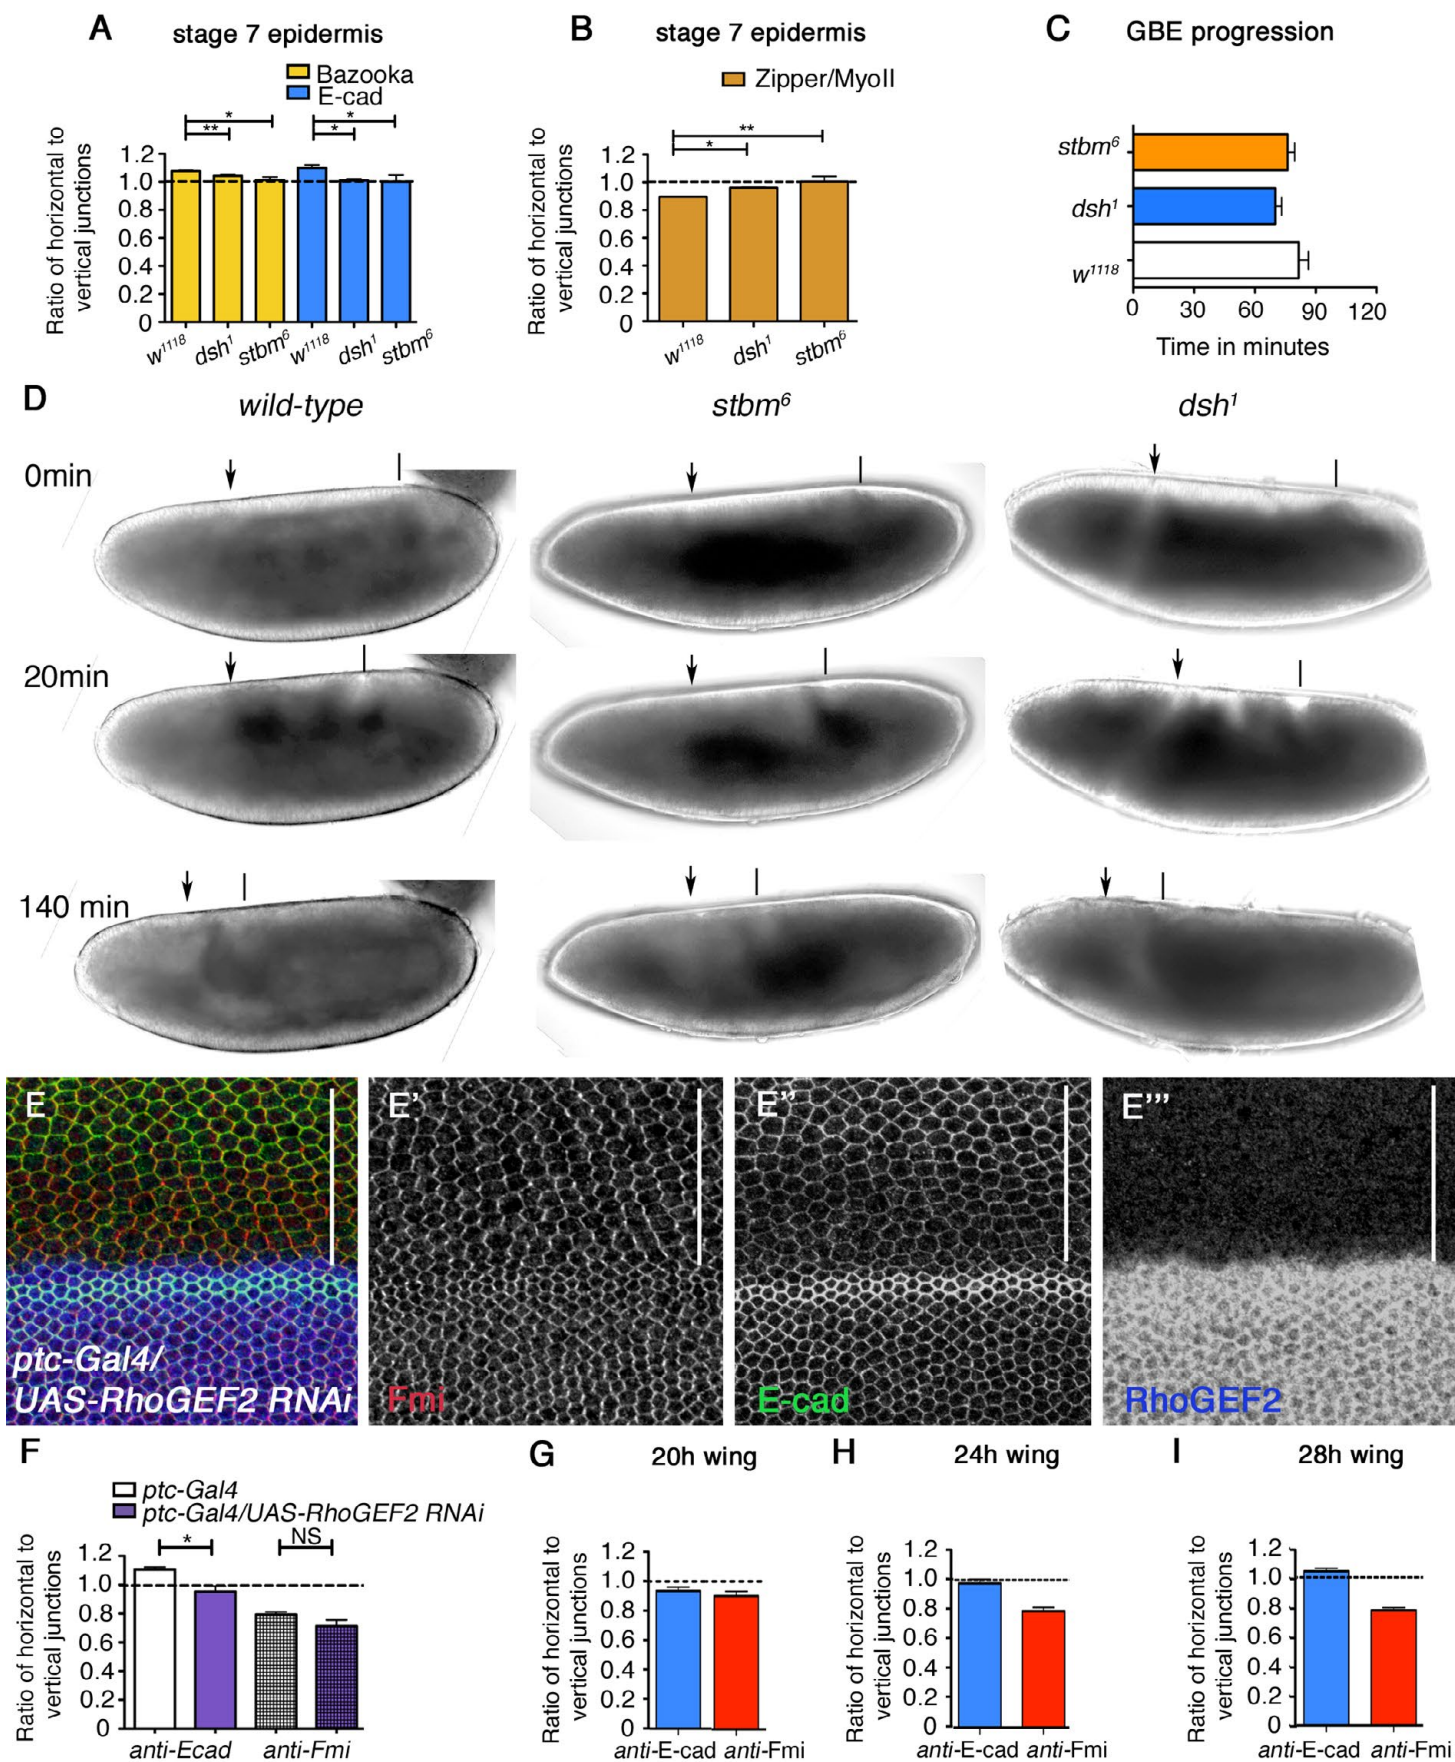

**Fig. S4. Effects of core pathway mutants on protein asymmetry and germband extension in the embryo. (A)** Quantification of Bazooka (yellow) and E-cad (blue) asymmetric localisation on horizontal and vertical junctions in stage 7 ventrolateral epidermis in wild type ( $w^{1118}$ ),  $dsh^1$  and  $stbm^6$  shown as ratio of horizontal to vertical (a value of 1 indicates symmetric localisation). Asterisks above the charts show individual results from a Dunnett's multiple comparison test ( $*P \leq 0.05$ ,  $**P \leq 0.01$ ). **(B)** Quantification of Zipper on horizontal and vertical junctions in stage 7 epidermis in wild type ( $w^{1118}$ ),  $dsh^1$  and  $stbm^6$ .  $*P=0.0114$ ,  $**P=0.0009$ . **(C)** Quantification of the time taken for the fast phase of germband elongation to complete for wild type ( $w^{1118}$ ) and  $dsh^1$  and  $stbm^6$  mutants; an ANOVA test shows that  $w^{1118}$  is not significantly different from the mutants ( $P=0.3411$ ). **(D)** Images of germband extending wild-type ( $w^{1118}$ ),  $dsh^1$  and  $stbm^6$  embryos at 0 minutes, 20 minutes and 140 minutes. Arrows indicate the anterior furrow, lines indicate the posterior end of the germband. **(E-E''')** RhoGEF2 knockdown by RNAi in the *ptc-GAL4* domain of a pupal wing (indicated by white line) immunolabelled for RhoGEF2 (blue in E, white in E'''), Fmi (red in E, white in E') and E-cad (green in E, white in E''). Wild-type tissue is in the lower part of the image. E''' shows RhoGEF2 antibody specificity, loss of RhoGEF2 staining in *ptc-Gal4/UAS-RhoGEF2 RNAi* region. **(F)** Quantification of intensity ratios comparing horizontal with vertical junctions. E-cad (plain bars) and Fmi (checked bars) levels were compared in the *ptc-GAL4* domain of wings expressing *ptc-Gal4/UAS-RhoGEF2-RNAi* (purple bars) and control *ptc-GAL4* domains in wings expressing only *ptc-Gal4* (white bars). Asterisks above the charts show individual results from *t*-tests (NS, not significant;  $*P \leq 0.05$ ). Defects in cell packing were also investigated in the *ptc-GAL4* domain expressing *RhoGEF2-RNAi* compared with control *ptc-GAL4* wings (see Materials and methods); however, no difference was observed (*ptc-GAL4/UAS-RhoGEF2-RNAi*, mean number of cell sides=5.762 seconds, s.d.=0.754; *ptc-GAL4* only, mean number of cell sides=5.831 second, s.d.=0.671; *t*-test,  $P=0.0655$ ). **(G-I)** Quantification of endogenous junctional E-cad (blue) and Fmi (red) asymmetry in pupal wings showing ratios of anterior-posterior junctions to proximal-distal junctions at 20 hours (J), 24 hours (K) and 28 hours (L). Error bars are s.d.

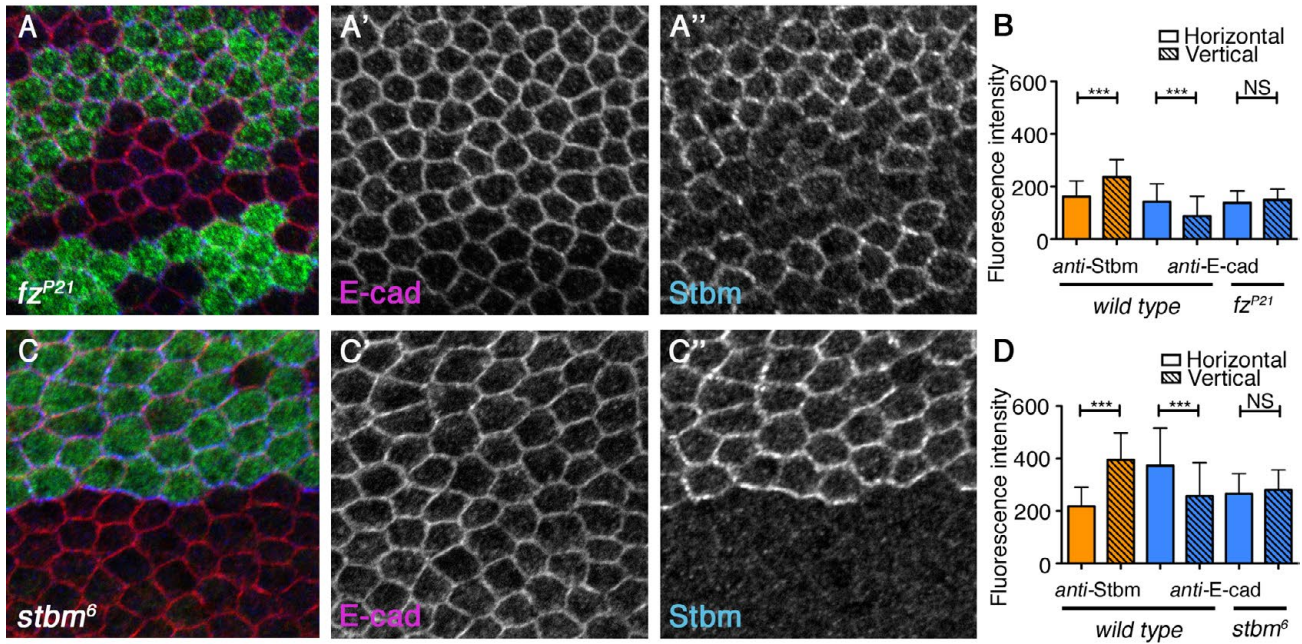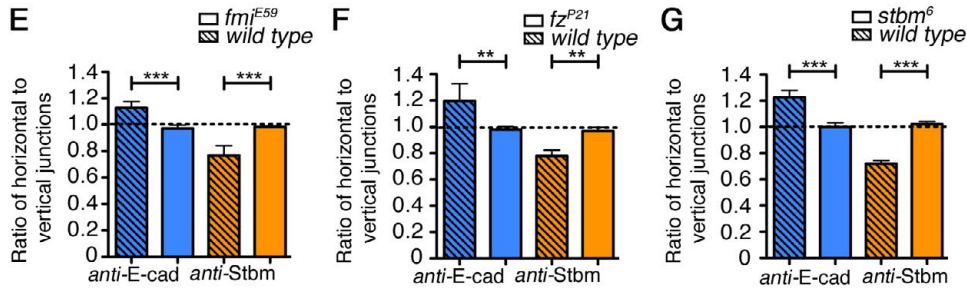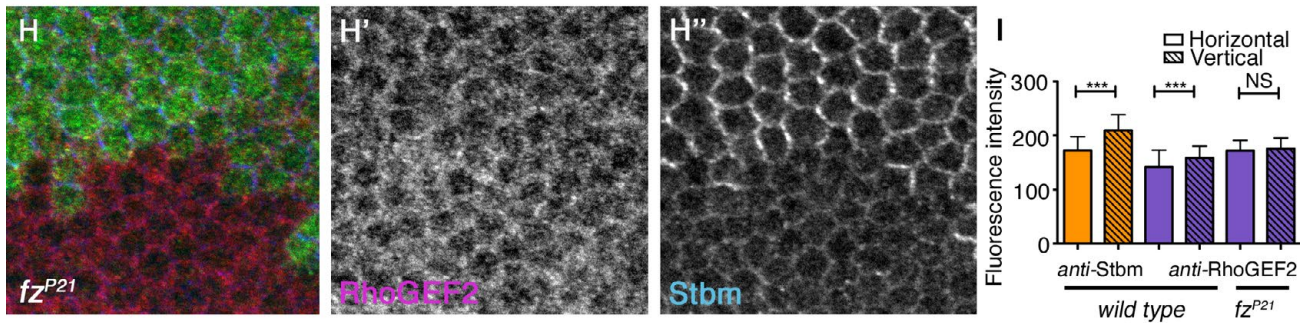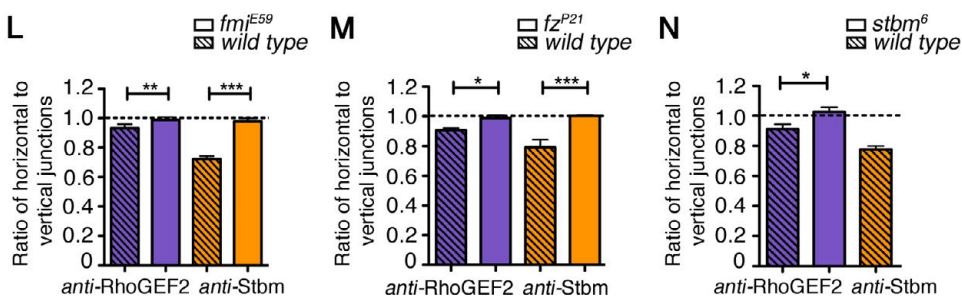

**Fig. S5. Effects of the core pathway on E-cad and RhoGEF2 localisation in the 28 hour pupal wing. (A-A'')** E-cad (magenta in A, white in A') and Stbm (blue in A, white in A'') in a  $fz^{P21}$  pupal wing clone marked by absence of *lacZ* expression (green in A). Distal is to the right in these and the following images. **(B)** Quantification of endogenous junctional E-cad in wild type and  $fz^{P21}$  (blue bars), and Stbm (orange bars) in wild-type 28 hour pupal wings. E-cad is increased on the horizontal junctions in wild-type tissue but this is lost in  $fz^{P21}$  (*t*-tests comparing horizontal and vertical intensities: Stbm in wild type,  $P \leq 0.0001$ ; E-cad in wild type,  $P \leq 0.0001$ ; E-cad in  $fz^{P21}$ ,  $P = 0.0770$ ). All error bars in this figure are s.d. **(C-C'')** Endogenous E-cad (magenta in C, white in C') and Stbm (blue in C, white in C'') in a  $stbm^6$  pupal wing clone marked by absence of *lacZ* expression (green in C). **(D)** Quantification of endogenous junctional E-cad in wild type and  $stbm^6$  (blue bars), and Stbm (orange bars) in wild-type 28 hour pupal wings. E-cad is increased on the horizontal junctions in wild-type tissue but this is lost in  $stbm^6$  (*t*-tests comparing horizontal and vertical intensities: Stbm in wild type,  $P \leq 0.0001$ ; E-cad in wild type,  $P \leq 0.0001$ ; E-cad in  $stbm^6$ ,  $P = 0.1279$ ). **(E-G)** Ratios of E-cad and Stbm on horizontal and vertical junctions in wild-type and  $fmi^{E59}$  (E),  $fz^{P21}$  (F) and  $stbm^6$  (G). Asterisks above the charts show individual results from a Bonferroni's multiple comparison test (\* $P \leq 0.05$ , \*\* $P \leq 0.01$ , \*\*\* $P \leq 0.0001$ ). **(H-H'')** RhoGEF2 (magenta in H, white in H') and Stbm (blue in H, white in H'') in a  $fz^{P21}$  pupal wing clone marked by absence of *lacZ* expression (green in H). **(I)** Quantification of endogenous junctional RhoGEF2 in wild type and  $fz^{P21}$  (purple bars), and Stbm (orange bars) in wild-type 28 hour pupal wings. RhoGEF2 is increased on the vertical junctions in wild-type tissue but this is lost in  $fz^{P21}$  (*t*-tests comparing horizontal and vertical intensities: Stbm in wild type,  $P \leq 0.0001$ ; RhoGEF2 in wild type,  $P \leq 0.0001$ ; RhoGEF2 in  $fz^{P21}$ ,  $P = 0.2030$ ). **(J-J'')** RhoGEF2 (magenta in J, white in J') and Stbm (blue in J, white in J'') in a  $stbm^6$  pupal wing clone marked by absence of *lacZ* expression (green in J). **(K)** Quantification of endogenous junctional RhoGEF2 in wild type and  $stbm^6$  (purple bars), and Stbm (orange bars) in wild-type 28 hour pupal wings. RhoGEF2 is increased on the vertical junctions in wild-type tissue but this is lost in  $stbm^6$  (*t*-tests comparing horizontal and vertical intensities: Stbm in wild type,  $P \leq 0.0001$ ; RhoGEF2 in wild type,  $P \leq 0.0001$ ; RhoGEF2 in  $stbm^6$ ,  $P = 0.9960$ ). **(L-N)** Ratios of RhoGEF2 and Stbm on horizontal and vertical junctional in wild type and  $fmi^{E59}$  (L),  $fz^{P21}$  (M) and  $stbm^6$  (N). Asterisks above the charts show individual results from a Bonferroni's multiple comparison test (\* $P \leq 0.05$ , \*\* $P \leq 0.01$ , \*\*\* $P \leq 0.0001$ ).

**Table S1. List of mutant alleles and transgenic constructs used**

| Name of gene                   | Allele                                           | Class                                        | Comments                  | Flybase reference |
|--------------------------------|--------------------------------------------------|----------------------------------------------|---------------------------|-------------------|
| <i>white</i>                   | <i>w<sup>1118</sup></i> (outcrossed to Oregon R) | n/a                                          | Used as wild type         | FBgn0003996       |
| <i>frizzled</i>                | <i>fz<sup>P21</sup></i>                          | Null allele                                  | Crossed out to wild type  | FBal0004937       |
| <i>strabismus (Van Gogh)</i>   | <i>stbm<sup>6</sup></i>                          | Null allele                                  | Crossed out to wild type  | FBal0062423       |
| <i>dishevelled</i>             | <i>dsh<sup>1</sup></i>                           | Strong allele for planar polarity function   | Crossed out to wild type  | FBal0003138       |
| <i>prickle-spiny-legs</i>      | <i>pk-sple<sup>13</sup></i>                      | Null allele                                  | Crossed out to wild type  | FBal0060943       |
| <i>flamingo (starry night)</i> | <i>fmi<sup>E59</sup></i>                         | Null allele                                  |                           | FBal0101421       |
| <i>multiple wing hairs</i>     | <i>mwh<sup>1</sup></i>                           | Null allele                                  | Crossed out to wild type  | FBal0012675       |
| <i>fuzzy</i>                   | <i>fuzzy<sup>2</sup></i>                         | Null allele                                  | Crossed out to wild type  | FBal0004916       |
| <i>RhoGEF2</i>                 | <i>RhoGEF2<sup>6.5</sup></i>                     | Antimorphic allele                           | Zygotic mutants die early | FBal0085926       |
| <i>shotgun</i>                 | <i>shg<sup>IG27</sup></i>                        | P-element loss of function allele            |                           | FBgn0003391       |
| <i>Src42A</i>                  | <i>Src42A<sup>F80</sup></i>                      | Amino acid substitution in the kinase domain |                           | FBal0277626       |

| Name of construct                         | Comments                                                                                                                           | Flybase reference |
|-------------------------------------------|------------------------------------------------------------------------------------------------------------------------------------|-------------------|
| <i>UAS-fz</i>                             | UAS-driven expression of <i>frizzled</i>                                                                                           | FBal0060399       |
| <i>en-Gal4<sup>e16E</sup></i>             | Gal4 driven by the <i>engrailed</i> promoter                                                                                       | FBal0052377       |
| <i>shg-lacZ</i>                           | <i>lacZ</i> enhancer trap insertion in the <i>shotgun (E-cadherin)</i> locus                                                       | FBtp0039292       |
| <i>btl-Gal4</i>                           | Gal4 expression by the <i>breathless</i> promoter                                                                                  | FBti0072919       |
| <i>UAS-Apoliner<sup>5</sup></i>           | UAS-driven expression of Apoliner on II                                                                                            | FBti0131165       |
| <i>UAS-red-stinger</i>                    | UAS-driven expression of red stinger-NLS on III                                                                                    | FBtp0018199       |
| <i>UAS-<math>\alpha</math>-Cat-GFP</i>    | UAS-driven expression of $\alpha$ -Catenin tagged with GFP                                                                         | FBti0015823       |
| <i>UAS-Rab5<sup>SN</sup></i>              | UAS-driven expression of Rab5 dominant negative                                                                                    | FBal0189754       |
| <i>UAS-shg-DEFL<sup>6.3</sup> (GFP)</i> , | UAS-driven expression of E-cadherin tagged with GFP                                                                                | FBti0015825       |
| <i>UAS-RhoGEF<sup>5</sup></i>             | UAS-driven expression of RhoGEF2                                                                                                   | FBal0190772       |
| <i>RhoGEF2<sup>IR-HMS0118</sup></i>       | UAS-driven expression of RNAi targeting RhoGEF2                                                                                    | FBtp0065361       |
| <i>UAS-RhoA<sup>V14</sup></i>             | UAS-driven expression of RhoA <sup>V14</sup> dominant active                                                                       | FBal0105124       |
| <i>UAS-RhoA<sup>N19</sup></i>             | UAS-driven expression of RhoA <sup>N19</sup> dominant negative                                                                     | FBtp0008154       |
| <i>dsh-GFP</i>                            | Dishevelled tagged with GFP expressed under its endogenous promoter                                                                | FBti0017855       |
| <i>Ubi-E-cad-GFP</i>                      | E-cadherin tagged with GFP expressed under control of the <i>ubiquitin</i> promoter                                                | FBtp0014096       |
| <i>E-cad::GFP</i>                         | Knock-in of GFP into the endogenous <i>E-cadherin (shotgun)</i> locus                                                              | FBal0247908       |
| <i>hs-FLP</i>                             | Yeast FLP recombinase under control of a <i>heat-shock</i> promoter                                                                | FBst0005256       |
| <i>btl&gt;y+&gt;GAL4</i>                  | <i>breathless</i> promoter upstream of the GAL4 coding sequence, separated by an FRT cassette containing a <i>yellow</i> transgene | FBtp0020129       |
| <i>ptc-GAL4</i>                           | Gal4 driven by the <i>patched</i> promoter                                                                                         | FBal0040487       |
| <i>UAS-pk</i>                             | UAS-driven expression of Prickle                                                                                                   | FBal0101220       |
